# Supplementary material
Source: PubMed Central journal article supplement (PMC5749548)
Supplement: jci-128-94955-s001.pdf [file jci-128-94955-s001.pdf]

**Supplemental Table 1. Periosteal involvement and ossification in synovial sarcomas and other soft-tissue sarcomas.**

| age | gender | diagnosis     | location   | abutting bone           | ossification present | volume (cm <sup>3</sup> ) |
|-----|--------|---------------|------------|-------------------------|----------------------|---------------------------|
| 64  | male   | monophasic SS | arm        | (bicipital aponeurosis) |                      |                           |
| 28  | female | monophasic SS | thigh      | (intramuscular)         | yes                  |                           |
| 32  | female | monophasic SS | thigh      | (intramuscular)         | after chemo          |                           |
| 55  | female | monophasic SS | thigh      | (intramuscular)         | on bone scan         |                           |
| 61  | female | monophasic SS | thigh      | (knee joint capsule)    | yes                  |                           |
| 40  | female | monophasic SS | thigh      | (knee joint capsule)    | yes                  |                           |
| 25  | male   | monophasic SS | thigh      | (knee joint capsule)    | yes                  |                           |
| 41  | female | monophasic SS | calf       | (knee joint capsule)    |                      |                           |
| 33  | female | monophasic SS | neck       | hyoid                   |                      | 8                         |
| 48  | male   | monophasic SS | neck       | thyroid cartilage       |                      | 5                         |
| 31  | male   | monophasic SS | arm        | humerus                 | after chemo          | 9                         |
| 12  | male   | biphasic SS   | forearm    | olecranon               |                      | 45                        |
| 60  | male   | monophasic SS | forearm    | radius                  | yes                  | 120                       |
| 24  | male   | monophasic SS | forearm    | radius                  | yes                  | 692                       |
| 61  | female | monophasic SS | forearm    | ulna                    | yes                  | 3                         |
| 28  | female | biphasic SS   | forearm    | ulna                    | yes                  | 164                       |
| 9   | male   | monophasic SS | wrist      | hamate                  |                      | 8                         |
| 32  | female | monophasic SS | hand       | metacarpal              | yes                  | 9                         |
| 50  | female | monophasic SS | chest wall | rib                     | yes                  | 23                        |

|    |        |               |             |         |              |      |
|----|--------|---------------|-------------|---------|--------------|------|
| 44 | female | biphasic SS   | chest wall  | rib     |              | n/a  |
| 20 | male   | monophasic SS | chest wall  | rib     |              | n/a  |
| 56 | female | monophasic SS | mediastinum | rib     |              | 272  |
| 81 | male   | biphasic SS   | mediastinum | rib     | yes          | 312  |
| 39 | male   | monophasic SS | flank       | spine   |              | 274  |
| 15 | female | monophasic SS | pelvis      | ilium   |              | 124  |
| 23 | male   | biphasic SS   | groin       | pubis   |              | 151  |
| 39 | female | monophasic SS | groin       | pubis   | yes          | 347  |
| 31 | female | monophasic SS | thigh       | femur   | yes          | 13   |
| 28 | male   | monophasic SS | thigh       | femur   | yes          | 27   |
| 54 | male   | biphasic SS   | thigh       | femur   | on bone scan | 190  |
| 20 | female | biphasic SS   | thigh       | femur   | yes          | 210  |
| 11 | female | biphasic SS   | thigh       | femur   |              | 288  |
| 49 | female | monophasic SS | thigh       | femur   | yes          | 1016 |
| 22 | male   | monophasic SS | thigh       | femur   | yes          | 1062 |
| 50 | female | monophasic SS | thigh       | femur   | yes          | 1271 |
| 24 | male   | monophasic SS | thigh       | femur   | yes          | 1765 |
| 23 | female | biphasic SS   | thigh       | patella |              | 3    |
| 69 | male   | biphasic SS   | calf        | fibula  | yes          | 1656 |
| 59 | male   | monophasic SS | calf        | fibula  |              | 1954 |
| 20 | male   | monophasic SS | calf        | tibia   | yes          | 1    |

|    |        |               |       |            |     |                    |     |
|----|--------|---------------|-------|------------|-----|--------------------|-----|
| 37 | female | monophasic SS | calf  | tibia      | yes | 10                 |     |
| 32 | male   | monophasic SS | calf  | tibia      | yes | 11                 |     |
| 29 | female | monophasic SS | calf  | tibia      |     | 26                 |     |
| 33 | female | monophasic SS | calf  | tibia      | yes | 65                 |     |
| 60 | male   | monophasic SS | calf  | tibia      |     | 646                |     |
| 40 | female | monophasic SS | ankle | talus      |     | 3                  |     |
| 4  | female | monophasic SS | foot  | metatarsal | yes | 2                  |     |
| 24 | male   | monophasic SS | foot  | metatarsal |     | n/a                |     |
|    |        |               |       |            |     | mean size          | 346 |
|    |        |               |       |            |     | standard deviation | 541 |

**first comparative cohort**

|    |        |                                         |            |      |  |  |
|----|--------|-----------------------------------------|------------|------|--|--|
| 55 | female | malignant peripheral nerve sheath tumor | shoulder   | none |  |  |
| 44 | male   | leiomyosarcoma                          | shoulder   | none |  |  |
| 86 | male   | epithelioid sarcoma                     | wrist      | none |  |  |
| 16 | female | pleiomorphic sarcoma NOS                | chest wall | none |  |  |
| 62 | male   | carcinosarcoma                          | flank      | none |  |  |
| 41 | male   | pleiomorphic sarcoma NOS                | back       | none |  |  |
| 68 | male   | solitary fibrous tumor malignant        | pelvis     | none |  |  |
| 68 | female | leiomyosarcoma                          | pelvis     | none |  |  |
| 69 | male   | pleiomorphic sarcoma NOS                | buttocks   | none |  |  |
| 60 | male   | myxofibrosarcoma                        | thigh      | none |  |  |
| 67 | male   | extraskelatal myxoid chondrosarcoma     | thigh      | none |  |  |

|    |        |                                     |            |         |  |      |
|----|--------|-------------------------------------|------------|---------|--|------|
| 64 | female | pleiomorphic sarcoma NOS            | thigh      | none    |  |      |
| 73 | female | dedifferentiated liposarcoma        | thigh      | none    |  |      |
| 86 | male   | angiosarcoma                        | thigh      | none    |  |      |
| 78 | male   | pleiomorphic sarcoma NOS            | thigh      | none    |  |      |
| 57 | male   | well-differentiated liposarcoma     | thigh      | none    |  |      |
| 54 | male   | myxoid liposarcoma                  | thigh      | none    |  |      |
| 80 | female | extraskeletal myxoid chondrosarcoma | thigh      | none    |  |      |
| 34 | male   | epithelioid sarcoma                 | calf       | none    |  |      |
| 56 | female | myxoid fibrosarcoma                 | calf       | none    |  |      |
| 14 | female | clear cell sarcoma                  | shoulder   | scapula |  | 55   |
| 23 | male   | MPNST                               | shoulder   | scapula |  | 550  |
| 80 | male   | pleiomorphic sarcoma NOS            | shoulder   | scapula |  | 4140 |
| 55 | male   | fibrosarcoma                        | chest wall | spine   |  | 106  |
| 69 | male   | pleiomorphic sarcoma NOS            | pelvis     | ilium   |  | 475  |
| 57 | male   | pleiomorphic sarcoma NOS            | thigh      | femur   |  | 1255 |
| 62 | male   | hemangiopericytoma                  | thigh      | pubis   |  | 1981 |
| 65 | male   | pleiomorphic sarcoma NOS            | calf       | tibia   |  | 123  |

mean size 1086  
standard deviation 1402

Two-tailed Fisher's Exact Test comparing bone abutment proportion,  $p = 0.00000383$   
Student's t-test comparing size of tumors,  $p = 0.015$

**second comparative cohort**

|    |        |                          |            |      |  |  |
|----|--------|--------------------------|------------|------|--|--|
| 60 | female | pleiomorphic sarcoma NOS | neck       | none |  |  |
| 41 | male   | pleiomorphic sarcoma NOS | shoulder   | none |  |  |
| 70 | male   | pleiomorphic sarcoma NOS | shoulder   | none |  |  |
| 81 | female | pleiomorphic sarcoma NOS | shoulder   | none |  |  |
| 70 | male   | pleiomorphic sarcoma NOS | shoulder   | none |  |  |
| 78 | male   | pleiomorphic sarcoma NOS | arm        | none |  |  |
| 55 | male   | pleiomorphic sarcoma NOS | arm        | none |  |  |
| 81 | male   | pleiomorphic sarcoma NOS | elbow      | none |  |  |
| 72 | male   | pleiomorphic sarcoma NOS | wrist      | none |  |  |
| 50 | male   | pleiomorphic sarcoma NOS | hand       | none |  |  |
| 70 | male   | pleiomorphic sarcoma NOS | chest wall | none |  |  |
| 64 | female | pleiomorphic sarcoma NOS | chest wall | none |  |  |
| 70 | female | pleiomorphic sarcoma NOS | chest wall | none |  |  |
| 70 | female | pleiomorphic sarcoma NOS | chest wall | none |  |  |
| 65 | male   | pleiomorphic sarcoma NOS | back       | none |  |  |
| 66 | male   | pleiomorphic sarcoma NOS | back       | none |  |  |
| 54 | male   | pleiomorphic sarcoma NOS | groin      | none |  |  |
| 82 | male   | pleiomorphic sarcoma NOS | buttocks   | none |  |  |
| 73 | female | pleiomorphic sarcoma NOS | thigh      | none |  |  |
| 41 | female | pleiomorphic sarcoma NOS | thigh      | none |  |  |

|    |        |                          |       |       |     |                    |      |
|----|--------|--------------------------|-------|-------|-----|--------------------|------|
| 55 | female | pleiomorphic sarcoma NOS | thigh | none  | yes |                    |      |
| 51 | female | pleiomorphic sarcoma NOS | thigh | none  |     |                    |      |
| 50 | female | pleiomorphic sarcoma NOS | calf  | none  |     |                    |      |
| 47 | male   | pleiomorphic sarcoma NOS | calf  | none  |     |                    |      |
| 39 | male   | pleiomorphic sarcoma NOS | calf  | none  |     |                    |      |
| 72 | male   | pleiomorphic sarcoma NOS | thigh | femur |     | 2327               |      |
| 74 | female | pleiomorphic sarcoma NOS | thigh | femur |     | 5763               |      |
| 67 | male   | pleiomorphic sarcoma NOS | thigh | femur |     | 560                |      |
|    |        |                          |       |       |     | mean size          | 2883 |
|    |        |                          |       |       |     | standard deviation | 2646 |

Two-tailed Fisher's Exact Test comparing bone abutment proportion,  $p = 0.00000383$

Student's t-test comparing size of tumors,  $p = 0.000006$

SS = synovial sarcoma

NOS = not otherwise specified

**Supplemental Table 2. Summary of Mouse Genotypes and Phenotypes.**

| Cre-recombinase activity                          | Alleles/conditions         |                             |                                                    |                  |                     |                              |                                              |                                |
|---------------------------------------------------|----------------------------|-----------------------------|----------------------------------------------------|------------------|---------------------|------------------------------|----------------------------------------------|--------------------------------|
|                                                   | <i>hSS2T</i> embryonic dox | <i>hSS2T</i> post-natal dox | <i>hSS2/hSS2</i> + <i>Tnfrsf11b</i> <sup>-/-</sup> | <i>hSS2/hSS2</i> | <i>hSS2</i> + rmOPG | <i>hSS2</i>                  | <i>hSS2</i> + <i>Ctnnb1</i> <sup>ex3fl</sup> | <i>Ctnnb1</i> <sup>ex3fl</sup> |
| TATCre injection                                  |                            |                             | slower SS growth                                   | faster SS growth | faster early growth | slower early growth          | rapid SS growth near bones                   | *no phenotype                  |
| <i>Myf5Cre</i>                                    | SSs develop                | no tumors                   |                                                    |                  |                     | *SSs develop                 | *pre-natally lethal                          | *pre-natally lethal            |
| <i>Pax7Cre</i> <sup>ERT2</sup> + tamoxifen 1-2wk  |                            |                             |                                                    |                  |                     | no tumors                    |                                              |                                |
| <i>Pax7Cre</i> <sup>ERT2</sup> + tamoxifen at 2wk |                            |                             |                                                    |                  |                     | no tumors                    |                                              |                                |
| OcCre                                             |                            |                             |                                                    |                  |                     | P1 lethal + dense bones      | pre-natally lethal                           | pre-natally lethal             |
| Colla1Cre                                         |                            |                             |                                                    |                  |                     | P15-180 lethal + dense bones | pre-natally lethal                           | pre-natally lethal             |
| <i>Prx1Cre</i> <sup>ERT2</sup> + tamoxifen at 2wk |                            |                             |                                                    |                  |                     | jaw SSs develop              | complete lineage SSs                         | periosteal thickening          |
| <i>OsxCre</i> <sup>ERT</sup> + tamoxifen 2-4wk    |                            |                             |                                                    |                  |                     | no tumors                    | many SSs                                     | osteopetrosis                  |

\*previously reported

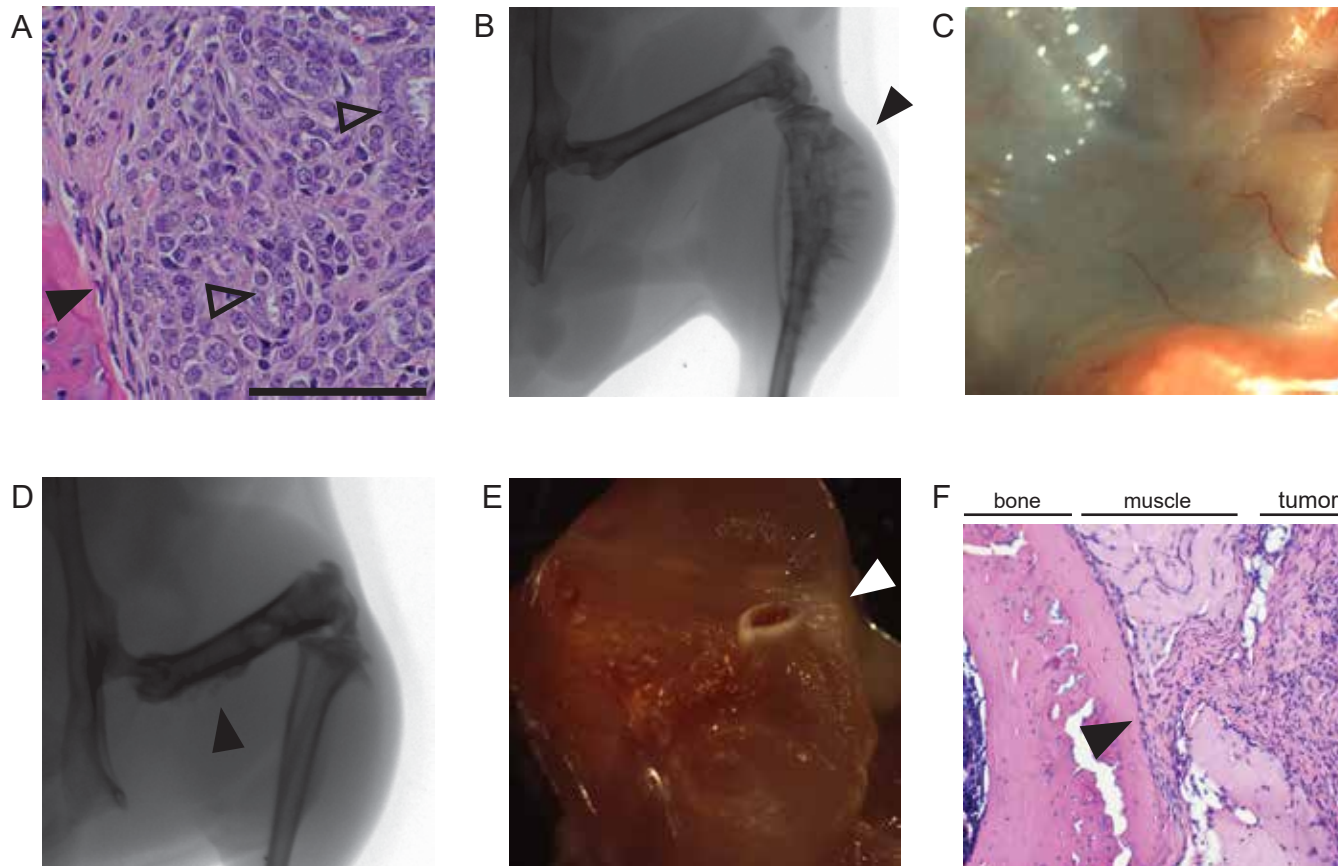

**Supplemental Figure 1. Synovial sarcomagenesis often approximates bone.** (A) Another representative H&E photomicrograph demonstrating a mouse SS immediately involving the periosteum (filled arrow), with classic SS features of epithelial gland formation nearby (open arrows). (B) Radiograph demonstrating pre-tibial tumorigenesis after TATCre injection near the bone. (C) Absence of tumorigenesis on gross photo of abdominal subcutaneous tissues after injection and (D) radiograph, (E) gross photo, and (F) H&E histology of a representative tumor that developed adjacent to bone after injection distant from bone in the thigh musculature. (magnification bar in A and panel width in F are each 100  $\mu$ m length)



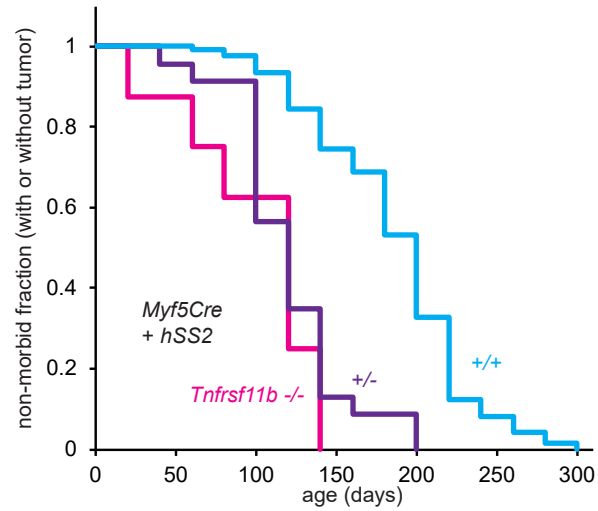

**Supplemental Figure 2. Mutant *Tnfrsf11b* is toxic to *Myf5Cre*;*hSS2* mice.** Kaplan-Meier curves demonstrating the non-morbid fraction of mice in each *Tnfrsf11b* genotype combined with *Myf5Cre* and *hSS2*. Notably none of the *Tnfrsf11b* mice reached morbidity due to tumorigenesis, although some had tumors detected at necropsy. Tumor-related morbidity characterized the index morbidity for nearly all of the *Tnfrsf11b* homozygous wildtype mice.

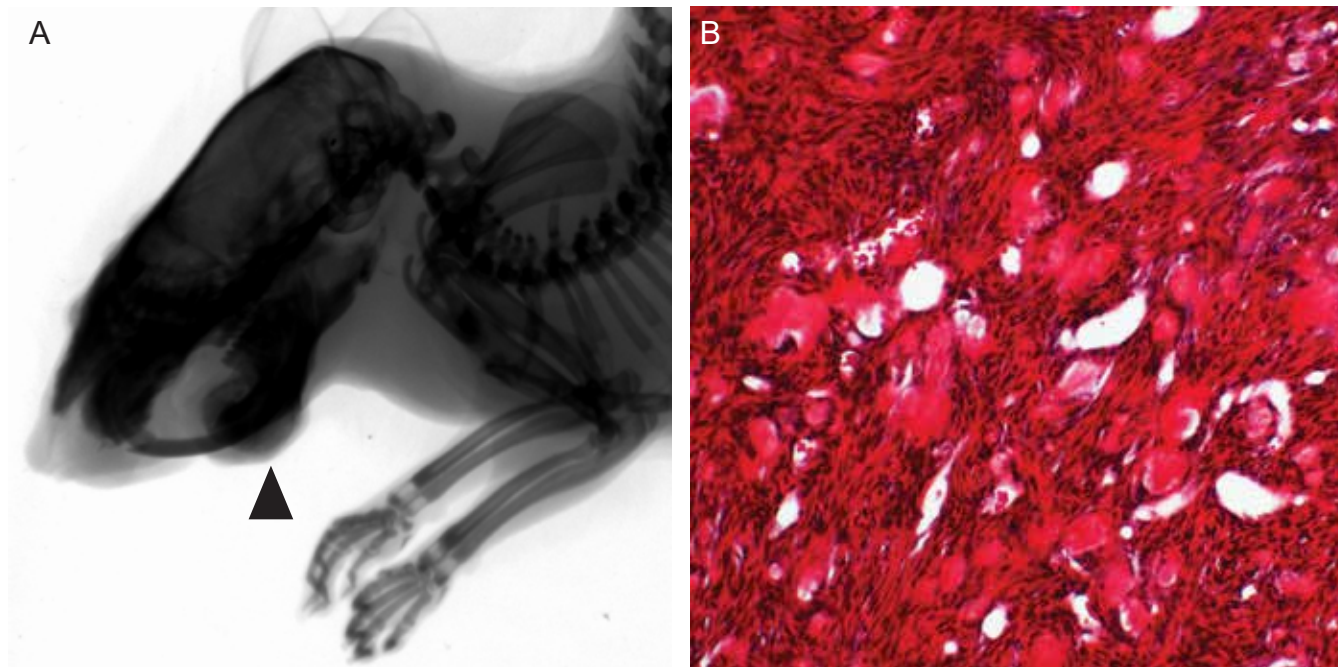

**Supplemental Figure 3. Mandibular abnormality following *Ctnnb1* stabilization alone in pre-osteoblasts.** (A) Lateral radiograph of the single, non-aggressive jaw mass (black arrow) that formed among 7 *OsxCre<sup>ERT</sup>;Ctnnb1<sup>ex3fl/wt</sup>* mice at age 12 months. (B) Masson's trichrome photomicrograph from the mass shows a bland fibroblastic proliferation making islands of osteoid (red) lacking embedded osteocytes.
